# Supplementary material for: Adiposity Phenotypes and Associated Cardiometabolic Risk Profile in the Inuit Population of Nunavik
Source: MDPI journal article supplement (doi:10.3390/nu16050725), 2024-03-02
Supplement: s1 [file s1]

**Supplementary Table S1. Associations between anthropometric indices and body fat composition measures among Inuit**

|                        | Weight  |       |         | BMI     |       |         | WC      |       |         | WHtR    |       |         |
|------------------------|---------|-------|---------|---------|-------|---------|---------|-------|---------|---------|-------|---------|
|                        | β-Coeff | 95%CI | p-value |
| <b>Males</b>           |         |       |         |         |       |         |         |       |         |         |       |         |
| Percentage of body fat | 0.44    | 0.41  | 0.47    | <0.05   | 1.51  | 1.44    | 1.57    | <0.05 | 0.51    | 0.48    | 0.54  | <0.05   |
| Body fat mass          | 0.63    | 0.60  | 0.64    | <0.05   | 2.02  | 1.97    | 2.09    | <0.05 | 0.69    | 0.66    | 0.71  | <0.05   |
| VAT level              | 0.27    | 0.26  | 0.28    | <0.05   | 0.87  | 0.84    | 0.91    | <0.05 | 0.30    | 0.28    | 0.31  | <0.05   |
| <b>Females</b>         |         |       |         |         |       |         |         |       |         |         |       |         |
| Percentage of body fat | 0.47    | 0.45  | 0.49    | <0.05   | 1.33  | 1.29    | 1.38    | <0.05 | 0.49    | 0.47    | 0.52  | <0.05   |
| Body fat mass          | 0.72    | 0.70  | 0.73    | <0.05   | 1.87  | 1.84    | 1.91    | <0.05 | 0.67    | 0.65    | 0.70  | <0.05   |
| VAT level              | 0.31    | 0.29  | 0.31    | <0.05   | 0.81  | 0.78    | 0.84    | <0.05 | 0.29    | 0.28    | 0.31  | <0.05   |

Values are β- Regression coefficient (95%CI) for 1 unit increase in weight, BMI, WC, WHR. All models are adjusted for age

Abbreviations: BMI, body mass index; WC, waist circumference; VAT level, visceral adipose tissue level; WHR, Waist-to-height ratio;

**Supplementary Table S2. Association between anthropometric indices and cardiometabolic risk factors among Inuit**

|                              | Weight  |          |         | BMI     |        |         | WC      |       |         | WHtR     |        |         | VFL     |        |         |       |        |         |         |       |
|------------------------------|---------|----------|---------|---------|--------|---------|---------|-------|---------|----------|--------|---------|---------|--------|---------|-------|--------|---------|---------|-------|
|                              | β-Coeff | 95%CI    | p-value | β-Coeff | 95%CI  | p-value | β-Coeff | 95%CI | p-value | β-Coeff  | 95%CI  | p-value | β-Coeff | 95%CI  | p-value |       |        |         |         |       |
| LDL-C                        | 0.0095  | 0.0048   | 0.014   | <0.05   | 0.027  | 0.013   | 0.042   | <0.05 | 0.003   | -0.0085  | 0.015  | 0.5     | 0.28    | -1.56  | 2.12    | 0.8   | 0.04   | 0.0020  | 0.078   | <0.05 |
| HDL-C                        | -0.012  | -0.013   | -0.010  | <0.05   | -0.035 | -0.039  | -0.031  | <0.05 | -0.0015 | -0.0049  | 0.0019 | 0.4     | -0.078  | -0.62  | 0.46    | 0.8   | -0.015 | -0.027  | -0.0047 | <0.05 |
| TRIG                         | 0.024   | 0.020025 | 0.028   | <0.05   | 0.073  | 0.063   | 0.086   | <0.05 | 0.012   | 0.0023   | 0.023  | <0.05   | 2.28    | 0.69   | 3.87    | <0.05 | 0.051  | 0.018   | 0.083   | <0.05 |
| CHOL/HDL                     | 0.034   | 0.030    | 0.038   | <0.05   | 0.099  | 0.089   | .11     | <0.05 | 0.012   | 0.0029   | 0.021  | <0.05   | 1.43    | -0.018 | 2.88    | 0.06  | 0.051  | 0.021   | 0.081   | <0.05 |
| APOB                         | 0.013   | 0.011    | 0.015   | <0.05   | 0.0043 | 0.0036  | 0.0052  | <0.05 | 0.0023  | 0.00050  | 0.0041 | <0.05   | 0.41    | 0.11   | 0.69    | <0.05 | 0.0070 | 0.00099 | 0.013   | <0.05 |
| HbA1c <sup>1</sup>           | 0.0028  | -0.0038  | 0.0094  | 0.4     | 0.0040 | -0.016  | 0.024   | 0.7   | 0.0043  | -0.012   | 0.021  | 0.6     | -0.036  | -2.60  | 2.51    | 0.8   | -0.036 | -0.058  | 0.070   | 0.6   |
| Fasting glucose <sup>1</sup> | 0.0088  | 0.0061   | 0.011   | <0.05   | 0.028  | 0.019   | 0.036   | <0.05 | 0.0053  | -0.00048 | 0.011  | 0.07    | 0.97    | 0.031  | 1.91    | <0.05 | 0.01   | -0.011  | 0.031   | 0.4   |
| HOMA-IR <sup>1</sup>         | 0.085   | 0.074    | 0.095   | <0.05   | 0.24   | 0.21    | 0.27    | <0.05 | 0.0017  | -0.022   | 0.025  | 0.9     | -2.86   | -6.63  | 0.90    | 0.1   | 0.061  | -0.025  | 0.15    | 0.2   |
| SBP                          | 0.32    | 0.28     | 0.36    | <0.05   | 0.89   | 0.78    | 1.01    | <0.05 | 0.014   | -0.082   | 0.11   | 0.8     | -4.87   | -10.07 | 10.33   | 0.5   | 0.18   | -0.14   | 0.49    | 0.3   |
| DBP                          | 0.17    | 0.15     | 0.21    | <0.05   | 0.50   | 0.41    | 0.58    | <0.05 | 0.060   | -0.0069  | 0.13   | 0.08    | 5.15    | -5.62  | 15.91   | 0.3   | 0.31   | 0.077   | 0.52    | <0.05 |

Values are  $\beta$ - Regression coefficient (95%CI) for 1 unit increase in weight, BMI, WC, WHR or VFL. All models are adjusted for age, sex, smoking status and BMI in case of WC or VAT level

<sup>1</sup>Adjusted for age, sex, smoking status and T2D diagnosis

Abbreviations: BMI, body mass index; WC, waist circumference; VFL, visceral fat level; Waist-to-height ratio; ApoB, Alipoprotein-B; HDL-C, high-density lipoprotein; LDL-C, low-density lipoprotein; TG, triglycerides; HbA1c, Glycated hemoglobin

**Supplementary Table S3. Subgroup analysis of the association between anthropometric indices and cardiometabolic risk factors in Inuit men**

|                              | Weight  |         |         | BMI     |        |         | WC      |        |         | WHtR    |        |         | VFL     |        |         |      |          |        |       |       |
|------------------------------|---------|---------|---------|---------|--------|---------|---------|--------|---------|---------|--------|---------|---------|--------|---------|------|----------|--------|-------|-------|
|                              | β-Coeff | 95% IC  | p-value | β-Coeff | 95% IC | P-value | β-Coeff | 95% IC | p-value | β-Coeff | 95% IC | p-value | β-Coeff | 95% IC | p-value |      |          |        |       |       |
| LDL-C                        | 0.009   | 0.0046  | 0.014   | <0.05   | 0.03   | 0.016   | 0.047   | <0.05  | 0.0035  | -0.010  | 0.0170 | 0.6     | 0.22    | -2.13  | 2.58    | 0.9  | 0.033    | -0.010 | .077  | 0.1   |
| HDL-C                        | -0.009  | -0.012  | -0.0077 | <0.05   | -0.03  | -0.040  | -0.027  | <0.05  | -0.002  | -0.0079 | 0.0038 | 0.1     | -1.24   | -2.68  | 0.19    | 0.09 | -0.044   | -      | 0.05  | 0.05  |
|                              |         |         |         |         |        |         |         |        |         |         |        |         |         |        |         |      | 0.0067   |        |       |       |
| TG                           | 0.029   | 0.020   | 0.039   | <0.05   | 0.098  | 0.069   | 0.13    | <0.05  | 0.0097  | -0.016  | 0.036  | 0.1     | 3.57    | -2.87  | 10.01   | 0.3  | 0.084    | 0.25   | <0.05 | <0.05 |
| CHOL/HDL                     | 0.039   | 0.032   | 0.048   | <0.05   | 0.13   | 0.11    | 0.16    | <0.05  | 0.0088  | -0.013  | 0.031  | 0.8     | 2.66    | -2.78  | 8.11    | 0.3  | 0.074    | 0.21   | <0.05 | <0.05 |
| APOB                         | 0.005   | 0.0039  | 0.0065  | <0.05   | 0.018  | 0.013   | 0.022   | <0.05  | 0.0020  | -0.0016 | 0.0057 | 0.3     | 0.47    | -0.42  | 1.36    | 0.3  | 0.000015 | 0.023  | 0.05  | 0.05  |
| HbA1c <sup>1</sup>           | 0.0090  | -0.0042 | 0.022   | 0.2     | 0.028  | 0.0016  | 0.071   | 0.2    | 0.0011  | -0.036  | 0.038  | 0.5     | 1.16    | -8.10  | 10.40   | 0.8  | -0.11    | 0.13   | 1.0   | 1.0   |
| Fasting glucose <sup>1</sup> | 0.0070  | 0.0029  | 0.011   | <0.05   | 0.024  | 0.011   | 0.038   | <0.05  | 0.0053  | -0.0051 | 0.016  | 0.7     | 2.63    | -0.42  | 5.70    | 0.09 | 0.0038   | 0.078  | <0.05 | <0.05 |
| HOMA-IR                      | 0.084   | 0.065   | 0.10    | <0.05   | 0.28   | 0.21    | 0.34    | <0.05  | 0.018   | -0.033  | 0.068  | 0.6     | 6.41    | 9.40   | 0.4     | 0.08 | -0.11    | -0.26  | 0.4   | 0.4   |
| SBP                          | 0.34    | 0.27    | 0.40    | <0.05   | 1.10   | 0.90    | 1.30    | <0.05  | -0.077  | -0.25   | 0.095  | 0.6     | -28.08  | -70.79 | 14.71   | 0.1  | -0.43    | 0.69   | 0.65  | 0.65  |
| DBP                          | 0.21    | 0.16    | 0.25    | <0.05   | 0.67   | 0.52    | 0.82    | <0.05  | 0.068   | -0.059  | 0.20   | 0.4     | 8.83    | -22.77 | 40.43   | 0.5  | 0.067    | 0.89   | <0.05 | <0.05 |

Values are β- Regression coefficient (95%CI) for 1 unit increase in weight, BMI, WC or VAT level. All models are adjusted for age, smoking status and BMI in case of WC or VFL

<sup>1</sup>Adjusted for age, smoking status and T2D diagnosis

Abbreviations: BMI, body mass index; WC, waist circumference; VFL, visceral fat level; WHR, Waist-to-height ratio; ApoB, Alipoprotein-B; HDL-C, high-density lipoprotein; LDL-C, low-density lipoprotein; TG, triglycerides; HbA1c, Glycated hemoglobin

**Supplementary Table S4. Subgroup analysis of the association between anthropometric indices and cardiometabolic risk factors in Inuit premenopausal women (estimated by age under 55 years old)**

|                 | Weight  |                   |         | BMI     |                   |         | WC      |                   |          | WHR      |                   |         | VFL     |                   |         |       |        |        |        |     |
|-----------------|---------|-------------------|---------|---------|-------------------|---------|---------|-------------------|----------|----------|-------------------|---------|---------|-------------------|---------|-------|--------|--------|--------|-----|
|                 | β-Coeff | 95% <sub>IC</sub> | p-value | β-Coeff | 95% <sub>IC</sub> | p-value | β-Coeff | 95% <sub>IC</sub> | p-value  | β-Coeff  | 95% <sub>IC</sub> | p-value | β-Coeff | 95% <sub>IC</sub> | p-value |       |        |        |        |     |
| LDL-C           | 0.012   | 0.0044            | 0.021   | <0.05   | 0.036             | .011    | .061    | <0.05             | 0.0019   | -0.017   | 0.021             | 0.8     | 0.19    | -2.71             | 3.10    | 0.9   | 0.043  | -0.022 | 0.11   | 0.2 |
| HDL-C           | -0.011  | -0.014            | -0.0095 | <0.05   | -0.031            | -0.040  | -0.028  | <0.05             | -0.00090 | -0.0053  | 0.0035            | 0.7     | -0.15   | -0.81             | 0.52    | 0.7   | -      | -0.025 | 0.0052 | 0.2 |
| TG              | 0.021   | 0.017             | 0.025   | <0.05   | 0.065             | 0.054   | 0.076   | <0.05             | 0.0068   | -0.0023  | 0.016             | 0.1     | 1.96    | 0.59              | 3.34    | <0.05 | -      | -0.039 | 0.023  | 0.6 |
| CHOL/HDL        | 0.031   | 0.027             | 0.035   | <0.05   | 0.091             | 0.079   | 0.10    | <0.05             | 0.0070   | -0.0023  | 0.016             | 0.1     | 1.41    | -0.0084           | 2.83    | 0.05  | 0.0025 | -0.029 | 0.034  | 0.9 |
| APOB            | 0.0043  | 0.0034            | 0.0054  | <0.05   | 0.013             | 0.010   | 0.016   | <0.05             | 0.017    | -0.00038 | 0.0040            | 0.1     | 0.40    | 0.071             | 0.72    | <0.05 | 0.0035 | -      | 0.011  | 0.3 |
| HbA1c           | 0.0059  | -0.0091           | 0.0079  | 0.9     | -0.0063           | -0.033  | 0.02    | 0.6               | 0.0020   | -0.022   | 0.018             | 0.8     | -0.84   | -3.89             | 2.21    | 0.6   | 0.0048 | -0.063 | 0.073  | 0.9 |
| Fasting glucose | 0.011   | 0.0072            | 0.014   | <0.05   | 0.028             | 0.018   | 0.039   | <0.05             | 0.00052  | -0.0066  | 0.0076            | 0.9     | -0.21   | -1.31             | 0.90    | 0.7   | -0.018 | -0.046 | 0.011  | 0.2 |
| HOMA-IR         | 0.088   | 0.071             | 0.10    | <0.05   | 0.24              | 0.19    | 0.28    | <0.05             | -0.29    | -0.056   | -0.0011           | <0.05   | -7.29   | -11.61            | -2.98   | <0.05 | 0.018  | -0.094 | 0.13   | 0.7 |
| SBP             | 0.36    | 0.30              | 0.41    | <0.05   | 0.96              | 0.81    | 1.11    | <0.05             | 0.042    | -0.069   | 0.15              | 0.4     | 0.11    | -0.27             | 0.48    | 0.6   | 0.90   | -16.02 | 17.8   | 0.9 |
| DBP             | 0.18    | 0.14              | 0.22    | <0.05   | 0.50              | 0.39    | 0.62    | <0.05             | 0.054    | -0.033   | 0.14              | 0.2     | 7.61    | -5.52             | 20.71   | 0.3   | 0.15   | -0.14  | 0.45   | 0.3 |

Values are β- Regression coefficient (95%CI) for 1 unit increase in weight, BMI, WC or VAT level. All models are adjusted for age, smoking status and BMI in case of WC or VFL

<sup>1</sup>Adjusted for age, smoking status and T2D diagnosis

Abbreviations: BMI, body mass index; WC, waist circumference; Visceral fat level ; ApoB, Alipoprotein-B; HDL-C, high-density lipoprotein; LDL-C, low-density lipoprotein; TG, triglycerides; HbA1c, Glycated hemoglobin

**Supplementary Table S5. Subgroup analysis of the association between anthropometric indices and cardiometabolic risk factors in Inuit aged 20 years old and more**

|                 | Weight  |                   |         | BMI     |                   |         | WC      |                   |         | WHR     |                   |         | VFL     |                   |         |       |         |         |         |       |
|-----------------|---------|-------------------|---------|---------|-------------------|---------|---------|-------------------|---------|---------|-------------------|---------|---------|-------------------|---------|-------|---------|---------|---------|-------|
|                 | β-Coeff | 95% <sub>IC</sub> | p-value |       |         |         |         |       |
| LDL-C           | 0.0062  | 0.0022            | 0.01    | <0.05   | 0.017             | 0.0057  | 0.028   | <0.05             | 0.002   | -0.0068 | 0.012             | 0.5     | 0.24    | -1.21             | 1.69    | 0.7   | 0.03    | 0.0008  | 0.06    | <0.05 |
| HDL-C           | -0.013  | -0.014            | -0.011  | <0.05   | -0.038            | -0.043  | -0.034  | <0.05             | -0.0013 | -0.0049 | 0.0022            | 0.5     | -0.061  | -0.63             | 0.51    | 0.8   | -0.017  | -0.029  | -0.0058 | <0.05 |
| TG              | 0.27    | 0.022             | 0.031   | <0.05   | 0.080             | 0.065   | 0.094   | <0.05             | 0.012   | 0.0017  | 0.024             | <0.05   | 2.28    | 0.51              | 4.05    | <0.05 | 0.065   | 0.027   | 0.10    | <0.05 |
| CHOL/HDL        | 0.036   | 0.031             | 0.040   | <0.05   | 0.10              | 0.09    | 0.11    | <0.05             | 0.012   | 0.0024  | 0.022             | <0.05   | 1.47    | -0.11             | 3.05    | 0.06  | 0.062   | 0.029   | 0.095   | <0.05 |
| APOB            | 0.004   | 0.0035            | 0.0052  | <0.05   | 0.012             | 0.010   | 0.015   | <0.05             | 0.0024  | 0.00041 | 0.0043            | <0.05   | 0.42    | 0.12              | 0.73    | <0.05 | 0.0078  | 0.0013  | 0.014   | <0.05 |
| HbA1c           | 0.0054  | 0.0028            | 0.0080  | <0.05   | 0.022             | 0.014   | 0.029   | <0.05             | -0.0015 | -0.0075 | 0.0045            | 0.6     | 0.43    | -0.003            | 0.011   | 0.3   | -0.0071 | -0.0026 | 0.012   | 0.5   |
| Fasting glucose | 0.12    | 0.0084            | 0.016   | <0.05   | 0.038             | 0.026   | 0.050   | <0.05             | 0.0017  | -0.0061 | 0.0097            | 0.7     | 0.91    | -0.043            | 1.85    | 0.06  | -0.0095 | -0.038  | 0.019   | 0.5   |
| HOMA-IR         | 0.088   | 0.077             | 0.097   | <0.05   | 0.24              | 0.21    | 0.27    | <0.05             | -0.0013 | -0.022  | 0.019             | 0.9     | -3.42   | -6.79             | -0.047  | <0.05 | 0.073   | -0.0049 | 0.15    | 0.06  |
| SBP             | 0.32    | 0.27              | 0.36    | <0.05   | 0.90              | 0.77    | 1.037   | <0.05             | 0.027   | -0.076  | 0.13              | 0.6     | -0.42   | -16.81            | 15.95   | 0.9   | 0.25    | -0.08   | 0.61    | 0.2   |
| DBP             | 0.18    | 0.14              | 0.21    | <0.05   | 0.51              | 0.41    | 0.60    | <0.05             | 0.059   | -0.013  | 0.13              | 0.1     | 7.13    | -4.36             | 18.62   | 0.22  | 0.30    | 0.055   | 0.54    | 0.02  |

Values are  $\beta$ - Regression coefficient (95%CI) for 1 unit increase in weight, BMI, WC or VAT level. All models are adjusted for age, smoking status and BMI in case of WC or VFL

<sup>1</sup>Adjusted for age, smoking status and T2D diagnosis

Abbreviations: BMI, body mass index; WC, waist circumference; Visceral fat level ; ApoB, Alipoprotein-B; HDL-C, high-density lipoprotein; LDL-C, low-density lipoprotein; TG, triglycerides; HbA1c, Glycated hemoglobin

**Supplementary Table S6. Ideal anthropometric indices cut-offs to detect cardiometabolic disorders among Inuit**

|                    | BMI<br>kg/m <sup>2</sup> |             |             | WC<br>cm |             |             | WHtR    |             |             | VLF     |             |             |
|--------------------|--------------------------|-------------|-------------|----------|-------------|-------------|---------|-------------|-------------|---------|-------------|-------------|
|                    | Cut-off                  | Sensitivity | Specificity | Cut-off  | Sensitivity | Specificity | Cut-off | Sensitivity | Specificity | Cut-off | Sensitivity | Specificity |
| <b>Male</b>        |                          |             |             |          |             |             |         |             |             |         |             |             |
| Diabetes           | 28.4                     | 0.66        | 0.59        | 100      | 0.64        | 0.59        | 0.57    | 0.75        | 0.52        | 10      | 0.62        | 0.62        |
| Prediabetes        | 28.8                     | 0.62        | 0.60        | 100      | 0.62        | 0.60        | 0.63    | 0.72        | 0.53        | 10      | 0.61        | 0.64        |
| Insulin resistance | 26.7                     | 0.46        | 0.72        | 93.5     | 0.46        | 0.72        | 0.58    | 0.53        | 0.66        | 8       | 0.43        | 0.76        |
| Hypertension       | 25.6                     | 0.52        | 0.68        | 86.5     | 0.52        | 0.68        | 0.51    | 0.62        | 0.63        | 7       | 0.48        | 0.71        |
| Dyslipidemia       | 26.5                     | 0.55        | 0.64        | 86.5     | 0.55        | 0.64        | 0.53    | 0.65        | 0.59        | 6       | 0.52        | 0.68        |
| <b>Female</b>      |                          |             |             |          |             |             |         |             |             |         |             |             |
| Diabetes           | 29.9                     | 0.64        | 0.55        | 100      | 0.59        | 0.57        | 0.66    | 0.68        | 0.51        | 12      | 0.75        | 0.42        |
| Prediabetes        | 26.6                     | 0.62        | 0.56        | 93.5     | 0.58        | 0.58        | 0.62    | 0.70        | 0.53        | 13      | 0.73        | 0.43        |
| Insulin resistance | 24.6                     | 0.49        | 0.70        | 92.0     | 0.47        | 0.69        | 0.58    | 0.53        | 0.68        | 14      | 0.61        | 0.57        |
| Hypertension       | 28.9                     | 0.54        | 0.59        | 92.5     | 0.52        | 0.60        | 0.61    | 0.60        | 0.56        | 13      | 0.68        | 0.46        |
| Dyslipidemia       | 27.9                     | 0.57        | 0.59        | 96.5     | 0.55        | 0.60        | 0.63    | 0.64        | 0.56        | 13      | 0.71        | 0.46        |

Abbreviations: BMI, body mass index; WC, waist circumference; WHtR, waist-to-height ratio; VFL, visceral fat level

**Supplementary Table S7. Obesity features and associated cardiometabolic comorbidities of Nunavimmiut men and women aged 50 years old and more**

|                                                |       | Men |       | Women |      | p-value |
|------------------------------------------------|-------|-----|-------|-------|------|---------|
| N                                              |       | 139 |       | 233   |      |         |
| Obesity                                        | n (%) | 44  | 31.65 | 67    | 28.8 | <0.05   |
| Severe Obesity                                 | n (%) | 8   | 5.8   | 16    | 6.8  | 0.8     |
| Abdominal obesity                              | n (%) | 89  | 64.0  | 175   | 75.1 | <0.05   |
| Dyslipidemia                                   | n (%) | 46  | 33.1  | 93    | 39.9 | 0.2     |
| Insulin resistance                             | n (%) | 109 | 78.4  | 181   | 77.7 | 0.9     |
| Pre-diabetes                                   | n (%) | 24  | 16.2  | 53    | 22.7 | 0.2     |
| Type 2 diabetes                                | n (%) | 7   | 5.1   | 17    | 7.3  | 0.4     |
| Hypertension                                   | n (%) | 94  | 67.6  | 89    | 38.2 | <0.05   |
| Non-alcoholic Fatty Liver Disease <sup>2</sup> | n (%) | 5   | 3.6   | 5     | 2.2  | 0.4     |
| Advanced stage of liver fibrosis <sup>3</sup>  | n (%) | 0   | 0     | 1     | 0.42 | 0.4     |
